# Supplementary material for: Zooplankton Abundance Reflects Oxygen Concentration and Dissolved Organic Matter in a Seasonally Hypoxic Estuary
Source: MDPI journal article supplement (doi:10.3390/jmse10030427), 2022-03-15

# Zooplankton abundance reflects oxygen concentration and dissolved organic matter in seasonally hypoxic estuary

Jane B. Weinstock<sup>1,\*</sup>, Lourdes Vargas<sup>2</sup>, and Rachel Collin<sup>2</sup>

## SUPPLEMENT A

**Resumen:** La desoxigenación, calentamiento y acidificación de los océanos producto del cambio global y el aumento de las descargas de nutrientes son grandes amenazas para los ecosistemas marinos. A pesar de esto, los patrones espaciales y temporales de la disponibilidad de oxígeno y sus impactos en la vida marina han sido poco estudiados en comparación con el calentamiento y la acidificación, particularmente en los ecosistemas tropicales costeros. En este estudio medimos la abundancia de los principales grupos de zooplancton en el contexto de cinco parámetros ambientales covariables [temperatura, salinidad, oxígeno disuelto (DO), materia orgánica disuelta (DOM) y concentración de clorofila] en un estuario tropical durante un año. Los resultados de una regresión por mínimos cuadrados parciales explicaron el 20% de la variación en la comunidad y encontraron que la temperatura, la salinidad, el DO y la DOM eran los más importantes (VIP > 0,8). Un modelo generalizado lineal demostró que la profundidad, el DO, la salinidad y la clorofila tuvieron efectos significativos, y la temperatura y la DOM también tuvieron efectos significativos por medio de interacciones bidireccionales ( $p < 0,05$ ). Cuando se examinó por separado, la abundancia de cada grupo de zooplancton se explicó por una combinación diferente de factores ambientales, pero en todos los casos, el DO tuvo grandes efectos significativos y, en la mayoría de los casos, el DOM o sus interacciones también fueron significativos. Estos resultados demuestran que el ciclo estacional de hipoxia en este sistema afecta significativamente la abundancia de los principales grupos de zooplancton, lo que probablemente también afecte el reclutamiento de la fauna béntica a través de los impactos en el meroplancton y las redes alimentarias bentónico-pelágicas.

**Table S1.** Summary of count data for each plankton group, by site and depth. Samples were collected from 379 L of seawater, and thus the counts below represent abundance per 379 L

| Holoplankton        |       |        |     |      | Meroplankton            |       |        |     |      |
|---------------------|-------|--------|-----|------|-------------------------|-------|--------|-----|------|
|                     | Mean  | Median | Min | Max  |                         | Mean  | Median | Min | Max  |
| <b>Pteropods</b>    |       |        |     |      | <b>Bivalves</b>         |       |        |     |      |
| STRI 10 m           | 47.8  | 11.0   | 0   | 800  | STRI 10 m               | 131.3 | 84.5   | 7   | 641  |
| Cristobal 10 m      | 27.3  | 11.0   | 0   | 244  | Cristobal 10 m          | 382.6 | 252    | 14  | 3026 |
| Pastores 10 m       | 7.0   | 0      | 0   | 153  | Pastores 10 m           | 302.8 | 225    | 1   | 1520 |
| STRI 20 m           | 11.4  | 2      | 0   | 253  | STRI 20 m               | 303.3 | 204    | 1   | 1144 |
| Cristobal 20 m      | 12.3  | 2      | 0   | 317  | Cristobal 20 m          | 290.5 | 211.5  | 1   | 1281 |
| Pastores 20 m       | 1.3   | 0      | 0   | 29   | Pastores 20 m           | 149.1 | 31     | 1   | 1375 |
| <b>Chaetognaths</b> |       |        |     |      | <b>Gastropods</b>       |       |        |     |      |
| STRI 10 m           | 22.6  | 14.5   | 0   | 87   | STRI 10 m               | 43.9  | 27     | 0   | 483  |
| Cristobal 10 m      | 31.0  | 22     | 0   | 105  | Cristobal 10 m          | 81.8  | 66     | 0   | 315  |
| Pastores 10 m       | 37.0  | 21     | 0   | 570  | Pastores 10 m           | 133.8 | 41     | 0   | 1211 |
| STRI 20 m           | 46.8  | 26.5   | 3   | 271  | STRI 20 m               | 99.9  | 57     | 0   | 474  |
| Cristobal 20 m      | 27.7  | 16.5   | 0   | 114  | Cristobal 20 m          | 60.1  | 39     | 0   | 580  |
| Pastores 20 m       | 52.0  | 11     | 0   | 544  | Pastores 20 m           | 20.0  | 6      | 0   | 101  |
| <b>Larvaceans</b>   |       |        |     |      | <b>Plutei</b>           |       |        |     |      |
| STRI 10 m           | 102.0 | 83.5   | 2   | 328  | STRI 10 m               | 25.7  | 11     | 0   | 157  |
| Cristobal 10 m      | 133.2 | 119    | 1   | 381  | Cristobal 10 m          | 40.7  | 17.5   | 0   | 205  |
| Pastores 10 m       | 75.9  | 65     | 0   | 241  | Pastores 10 m           | 31.7  | 4      | 0   | 696  |
| STRI 20 m           | 41.5  | 25.5   | 0   | 208  | STRI 20 m               | 12.8  | 1      | 0   | 257  |
| Cristobal 20 m      | 44.5  | 13     | 0   | 237  | Cristobal 20 m          | 15.0  | 4.5    | 0   | 218  |
| Pastores 20 m       | 14.3  | 3      | 0   | 97   | Pastores 20m            | 5.0   | 1      | 0   | 109  |
| <b>Copepods</b>     |       |        |     |      | <b>Barnacle nauplii</b> |       |        |     |      |
| STRI 10 m           | 310.9 | 209    | 45  | 2574 | STRI 10 m               | 16.3  | 7.5    | 0   | 94   |
| Cristobal 10 m      | 380.8 | 291    | 15  | 1363 | Cristobal 10 m          | 27.5  | 7.5    | 0   | 222  |
| Pastores 10 m       | 816.7 | 677    | 0   | 2682 | Pastores 10 m           | 7.3   | 4      | 0   | 34   |
| STRI 20 m           | 545.8 | 242.5  | 13  | 4403 | STRI 20 m               | 59.7  | 23.5   | 0   | 602  |
| Cristobal 20 m      | 640.4 | 342.5  | 2   | 2976 | Cristobal 20 m          | 35.4  | 23.5   | 0   | 195  |
| Pastores 20 m       | 408.1 | 112.5  | 0   | 2693 | Pastores 20 m           | 17.0  | 2      | 0   | 155  |
|                     |       |        |     |      | <b>Barnacle cyprids</b> |       |        |     |      |
|                     |       |        |     |      | STRI 10 m               | 8.7   | 4.5    | 0   | 129  |
|                     |       |        |     |      | Cristobal 10 m          | 14.0  | 8      | 0   | 60   |
|                     |       |        |     |      | Pastores 10 m           | 5.7   | 4      | 0   | 31   |
|                     |       |        |     |      | STRI 20 m               | 11.2  | 7      | 0   | 55   |
|                     |       |        |     |      | Cristobal 20 m          | 6.8   | 4.5    | 0   | 50   |
|                     |       |        |     |      | Pastores 20 m           | 8.1   | 3      | 0   | 114  |

**Figure S1.** Piecewise linear regression of zooplankton abundance versus DO ( $\text{mg l}^{-1}$ ), conducted using the segmented package in R. Points are shown for 11 m (blue) and 21 m (red).

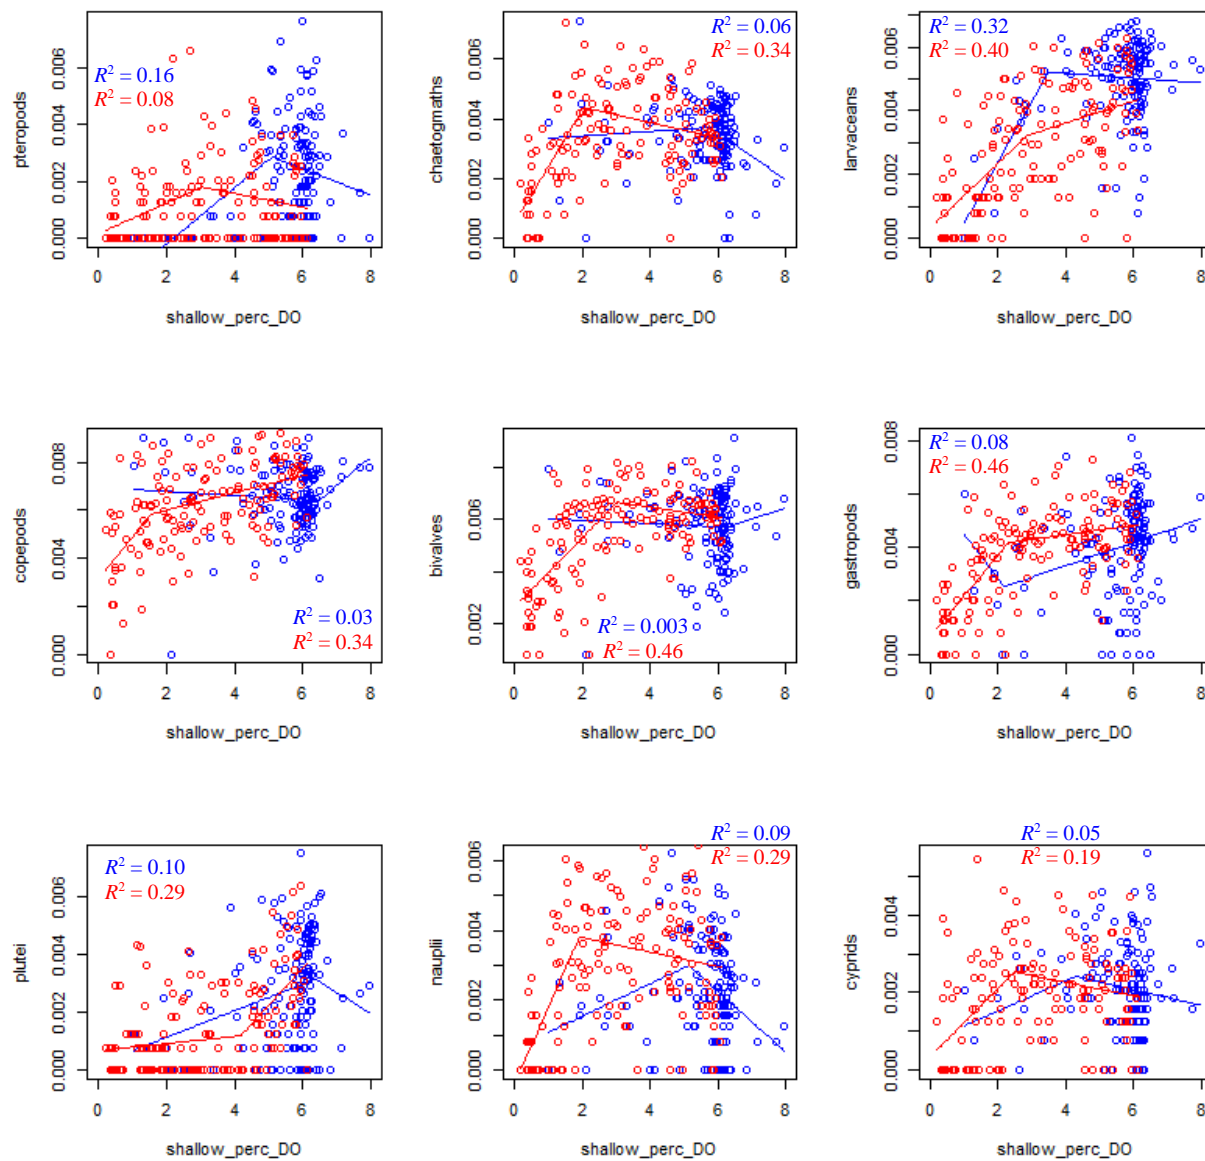

**Figure S2.** Zooplankton abundance versus DO (% saturation). Identical analysis for Figure 10, but using percent oxygen as calculated automatically by the YSI Sonde. Vertical dotted lines indicate identified breakpoints at 21 m for all groups, as well as at 11 m for larvaceans.

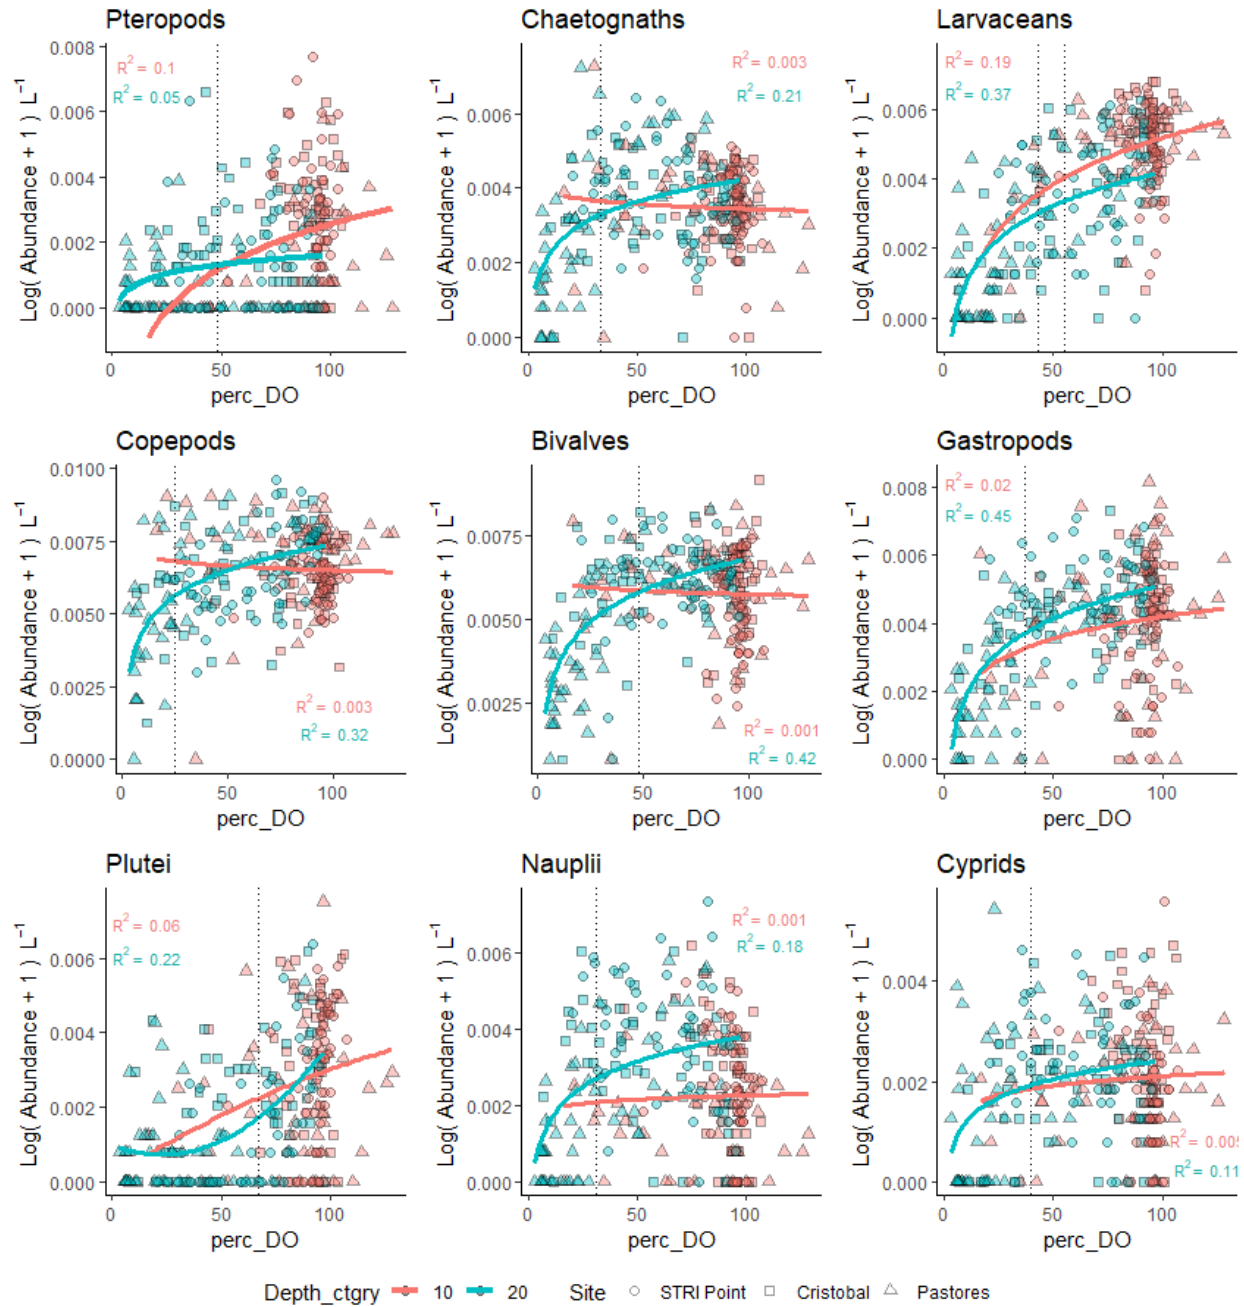

**Figure S3.** Zooplankton abundance versus DOM. Relationships between dissolved organic matter (DOM) and order-of-magnitude concentration of the nine groups of zooplankton. Trendlines lines show the best fit for the abundances at each depth, assuming a linear relationship. Point shape denotes site.

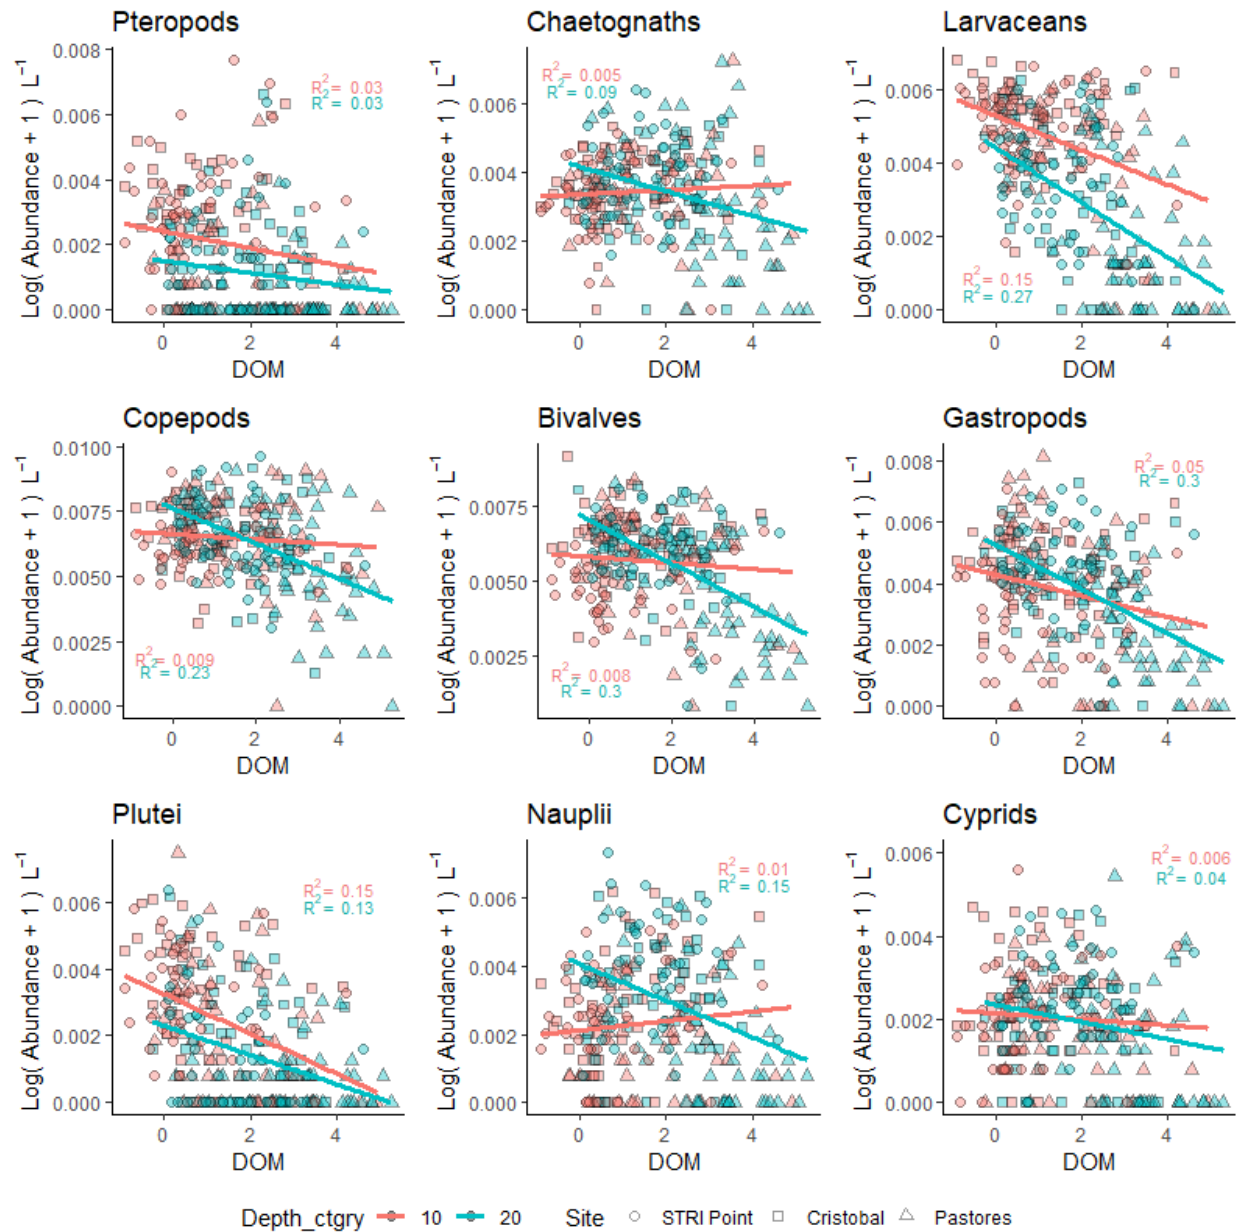

**Figure S4.** Zooplankton abundance versus temperature. Trendlines show the best fit for the abundances at each depth, assuming a linear relationship. Point shape denotes site.

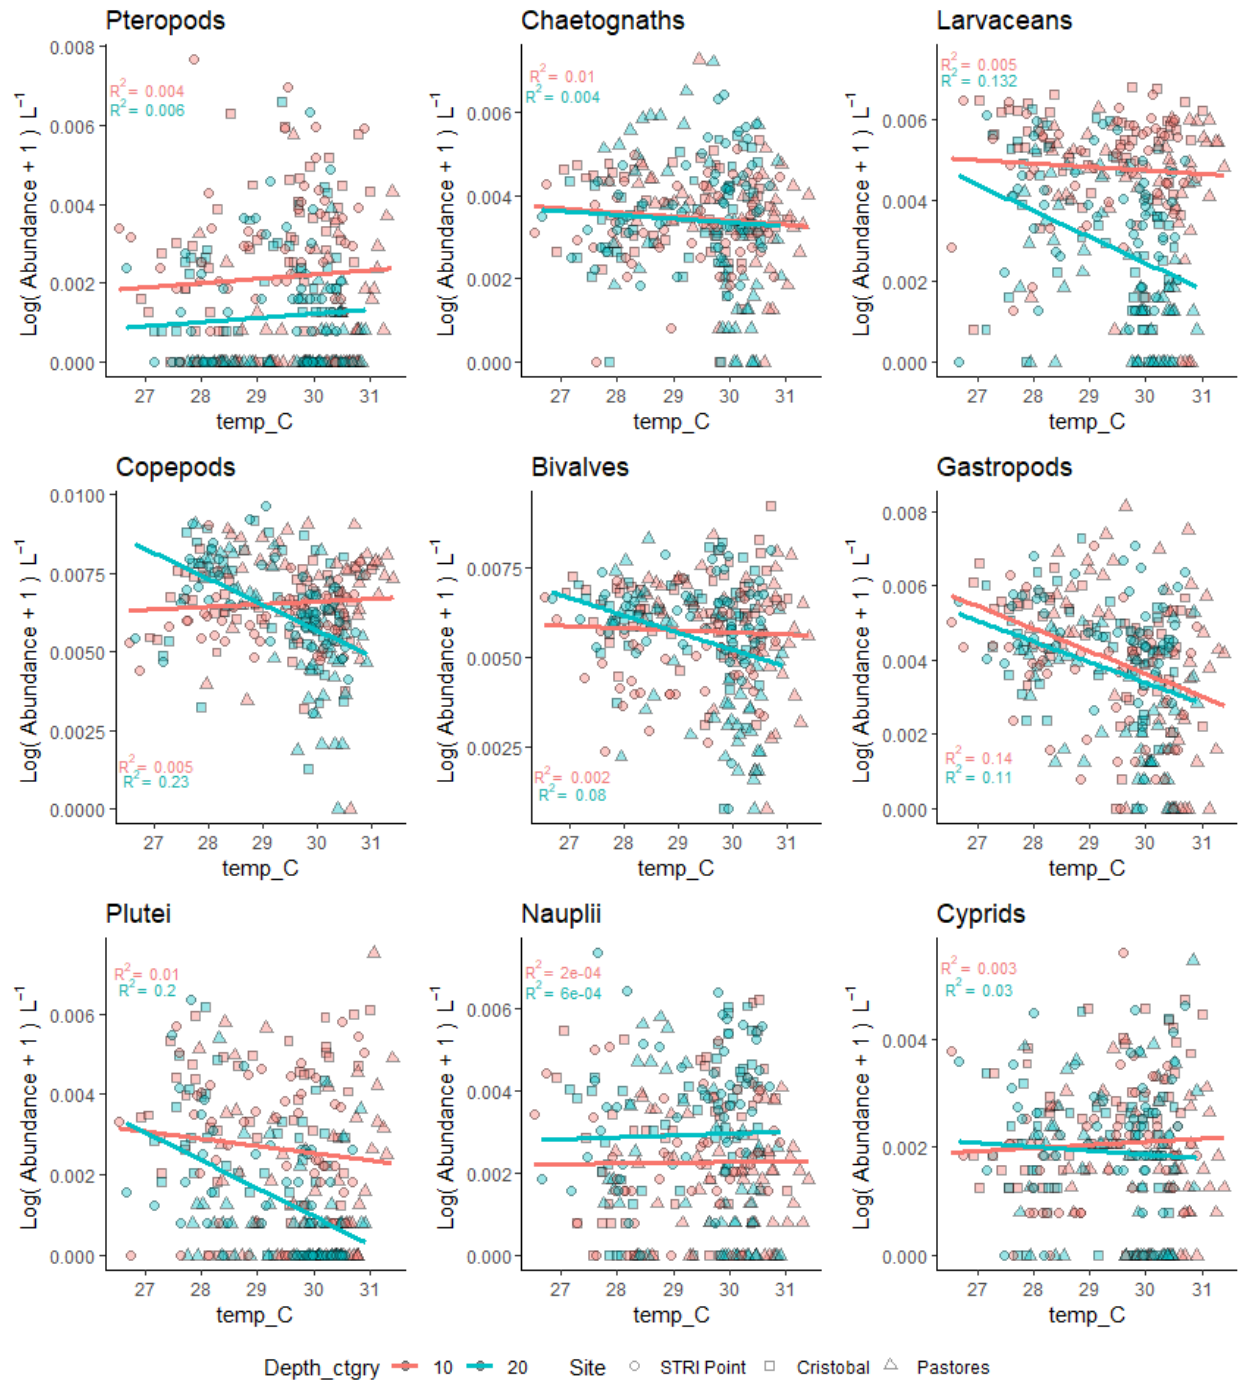



**Figure S5.** Zooplankton abundance versus Environmental PC1. Trendlines lines show the best fit for the abundances at each depth, assuming a quadratic relationship; to allow for decreases at both extremes. Point shape denotes site.

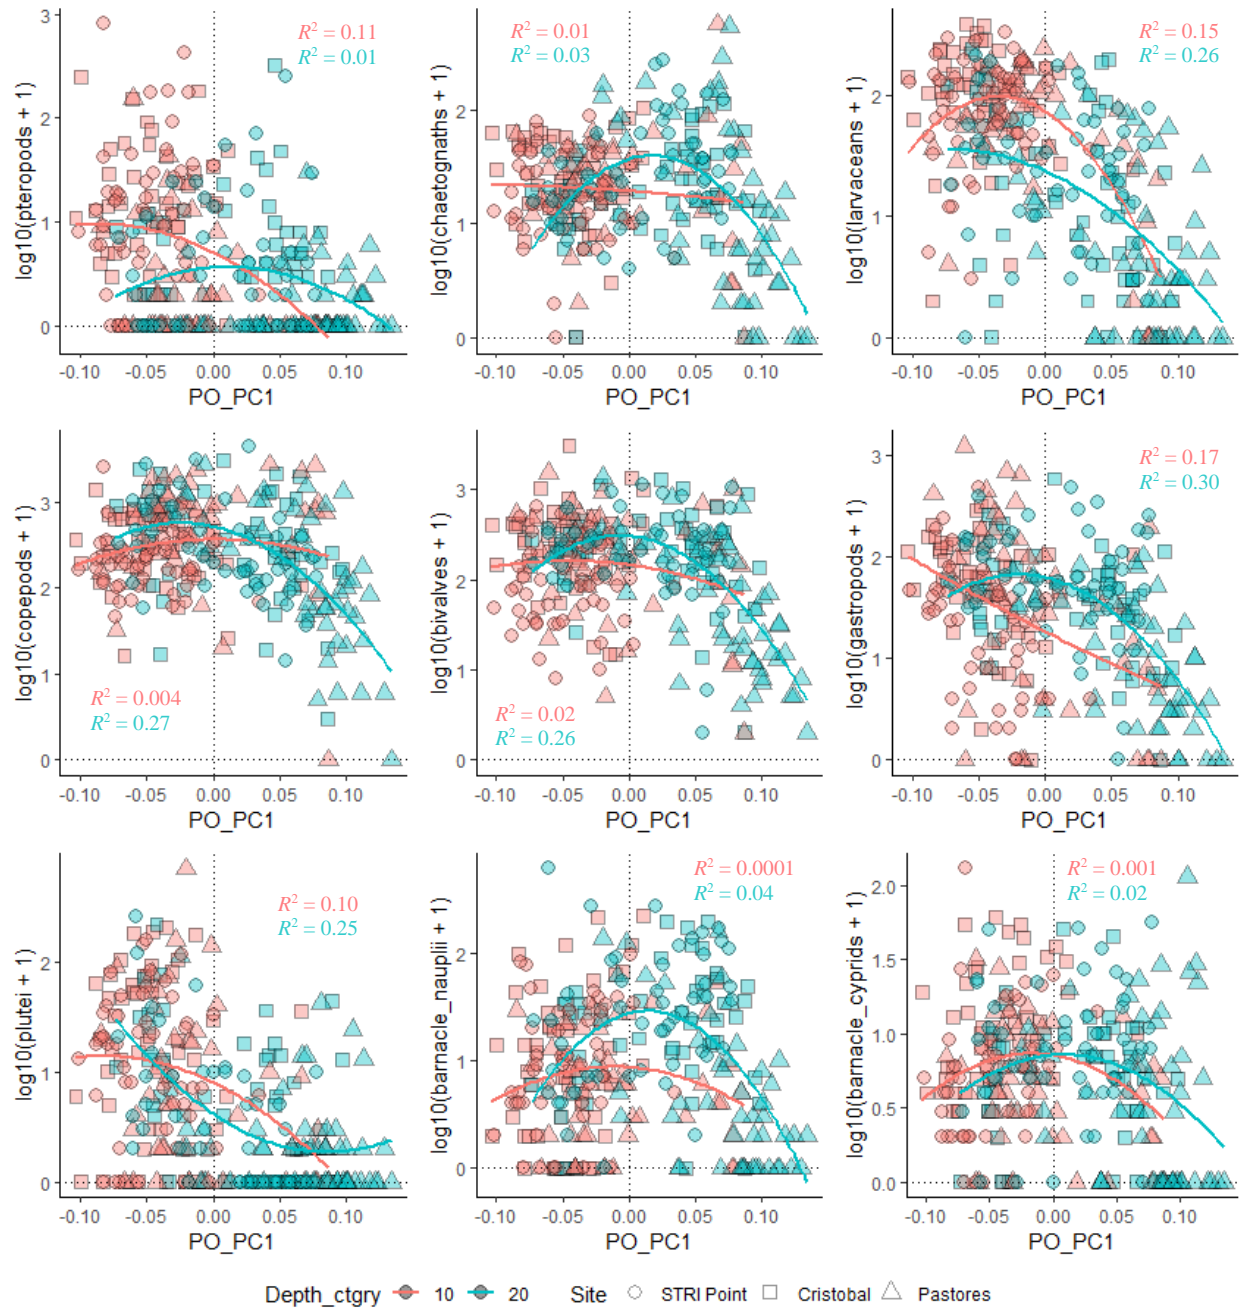

Supplement: s1 [file s1]
